# Supplementary material for: Enrichment of hydroxylated C24- and C26-acyl-chain sphingolipids mediates PIN2 apical sorting at trans-Golgi network subdomains
Source: PubMed Central journal article supplement (PMC5056404; doi:10.1038/ncomms12788), 2016-09-29
Supplement: ncomms12788-s1.pdf [file ncomms12788-s1.pdf]

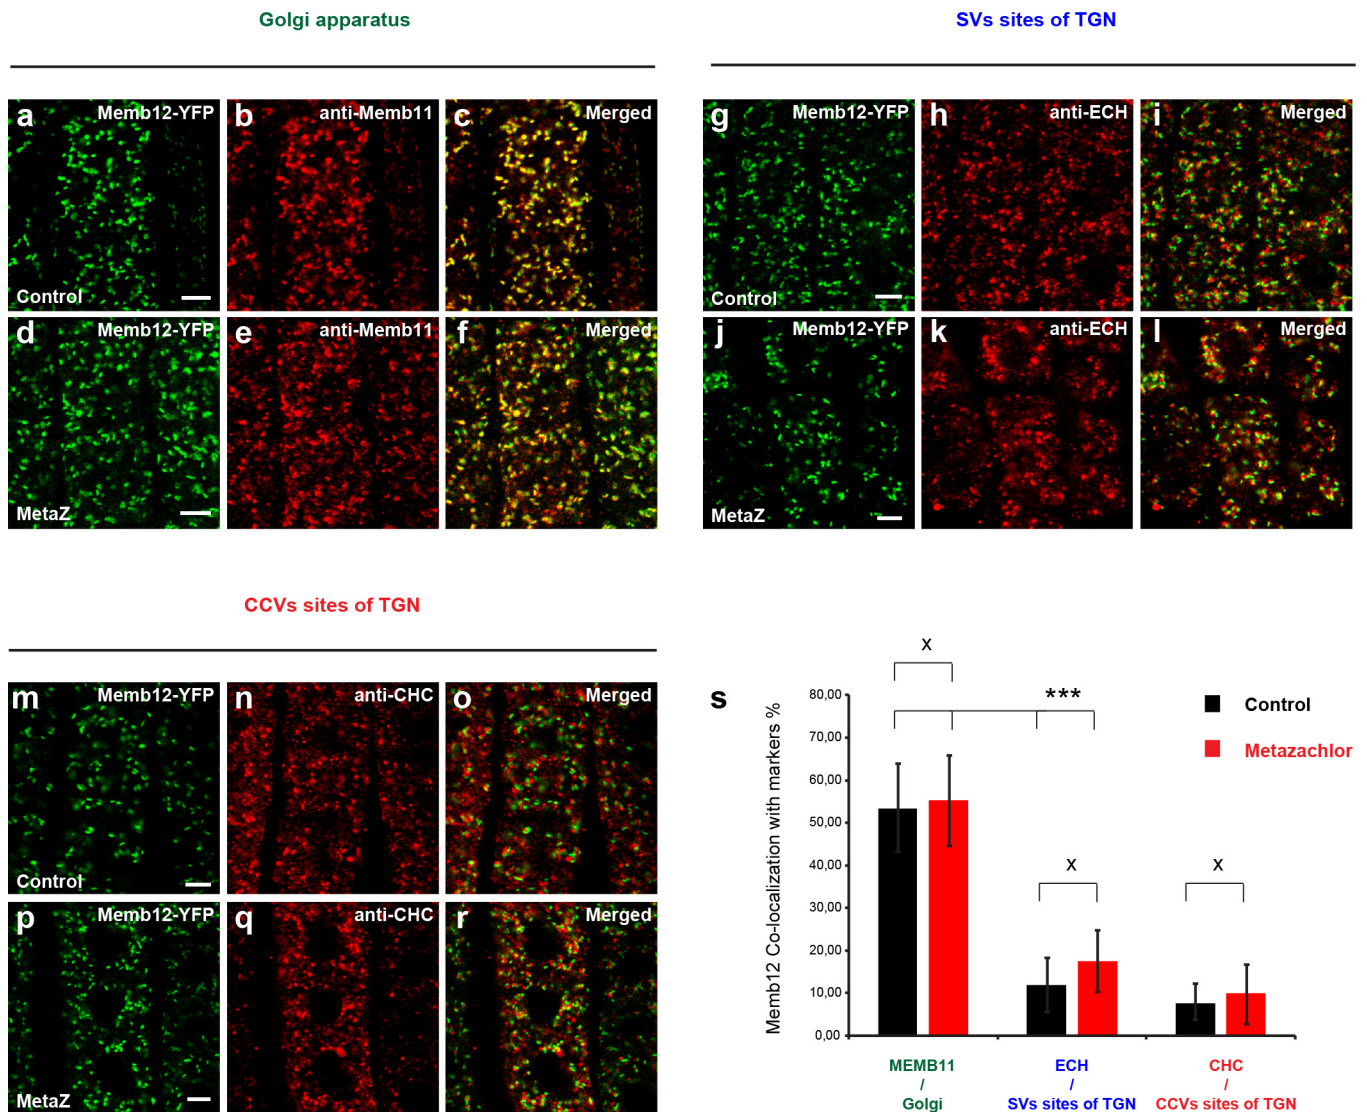

**Supplementary Fig. 1. The Golgi marker MEMB12 is distinct from the SVs/TGN marker ECH and the CCVs/TGN marker CHC and this separation is not abolished by metazachlor treatment.** (a-f) The Golgi marker MEMB12-YFP (a, d) strongly co-localises with the Golgi marker MEMB11 (b, e) both in mock treated (a-c) and metazachlor-treated (d-f) roots. (c, f) merged pictures of a, b and d, e respectively. (g-l) The Golgi marker MEMB12-YFP (g, j) is distinct from the SVs/TGN marker ECH (h, k) both in mock treated (g-i) and metazachlor-treated (j-l) roots. (i, l) merged pictures of g, h and j, k respectively. (m-r) The Golgi marker MEMB12-YFP (m, p) is distinct from the CCVs/TGN marker CHC (n, q) both in mock treated (m-o) and metazachlor-treated (p-r) roots. (o, r) merged pictures of m, n and p, q respectively. (s) Quantification of co-localisation between the Golgi marker MEMB12-YFP and either MEMB11 (Golgi), ECH (SVs/TGN) or CHC (CCVs/TGN). Statistics were done by two-sided Kruskal-Wallis rank sum test, X p-value > 0.05, \*\*\* p-value < 0.001, n = 40 cells distributed over 10 roots for each experiment (3 biological replicates). All scale bars are 5  $\mu$ m. Errors bars are s.e.m.

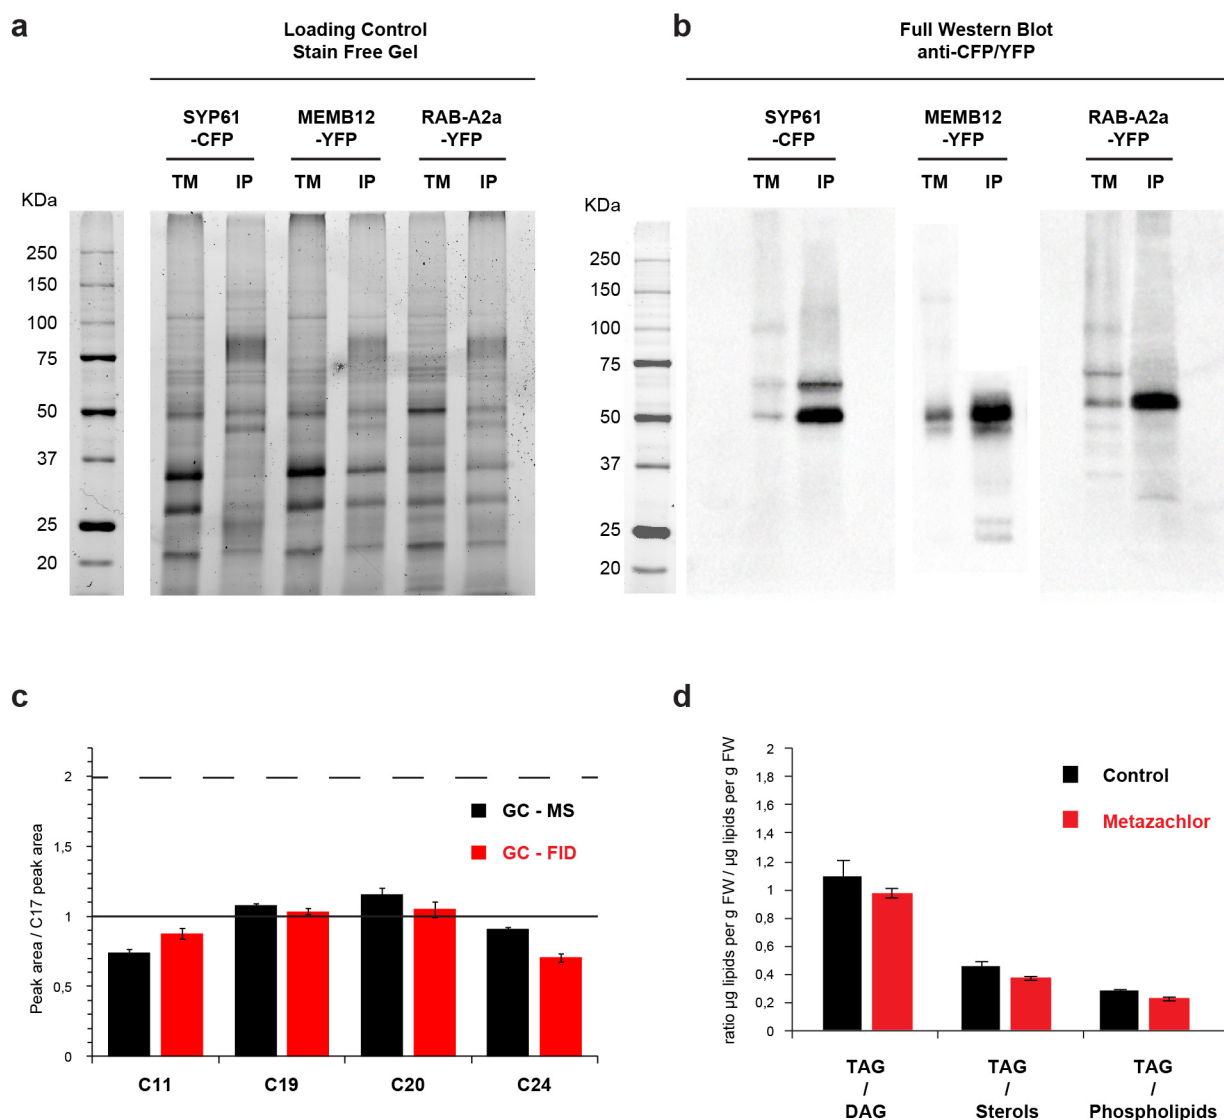

**Supplementary Fig. 2.** (a) Loading control of Fig. 1. Stain-Free polyacrylamide gel of total membrane fractions (TM: IP input) and immuno-precipitated fractions (IP: IP output) of SYP61-CFP (SVs/TGN), MEMB12-YFP (Golgi) and RAB-A2A-YFP (CCVs/TGN) compartments. Western-blot of corresponding gel are displayed in Fig. 1i. (b) Uncropped western-blot of anti-CFP/YFP blots in Fig. 1i showing enrichment of targeted compartments in IPs output (IP) as compared to IPs input (TM). (c) GC-MS and GC-FID analyses of fatty acids with different acyl-chain length (C11, C19, C20 and C24) loaded at the same quantity (50  $\mu\text{g}$ ) and showing similar results between GC-MS and GC-FID. Areas of peaks were integrated and normalized to the area of an internal standard (heptadecanoic acid, 17:0) added at the same amount (50  $\mu\text{g}$ ). (d) Triacylglycerol (TAG) and diacylglycerol (DAG) quantification in roots of 5-day-old Arabidopsis seedlings show no differences between untreated (black) and metazachlor-treated roots (red), whether for the TAG/DAG ratio or for the TAG/sterols or TAG/phospholipids ratios. Errors bars are s.d.

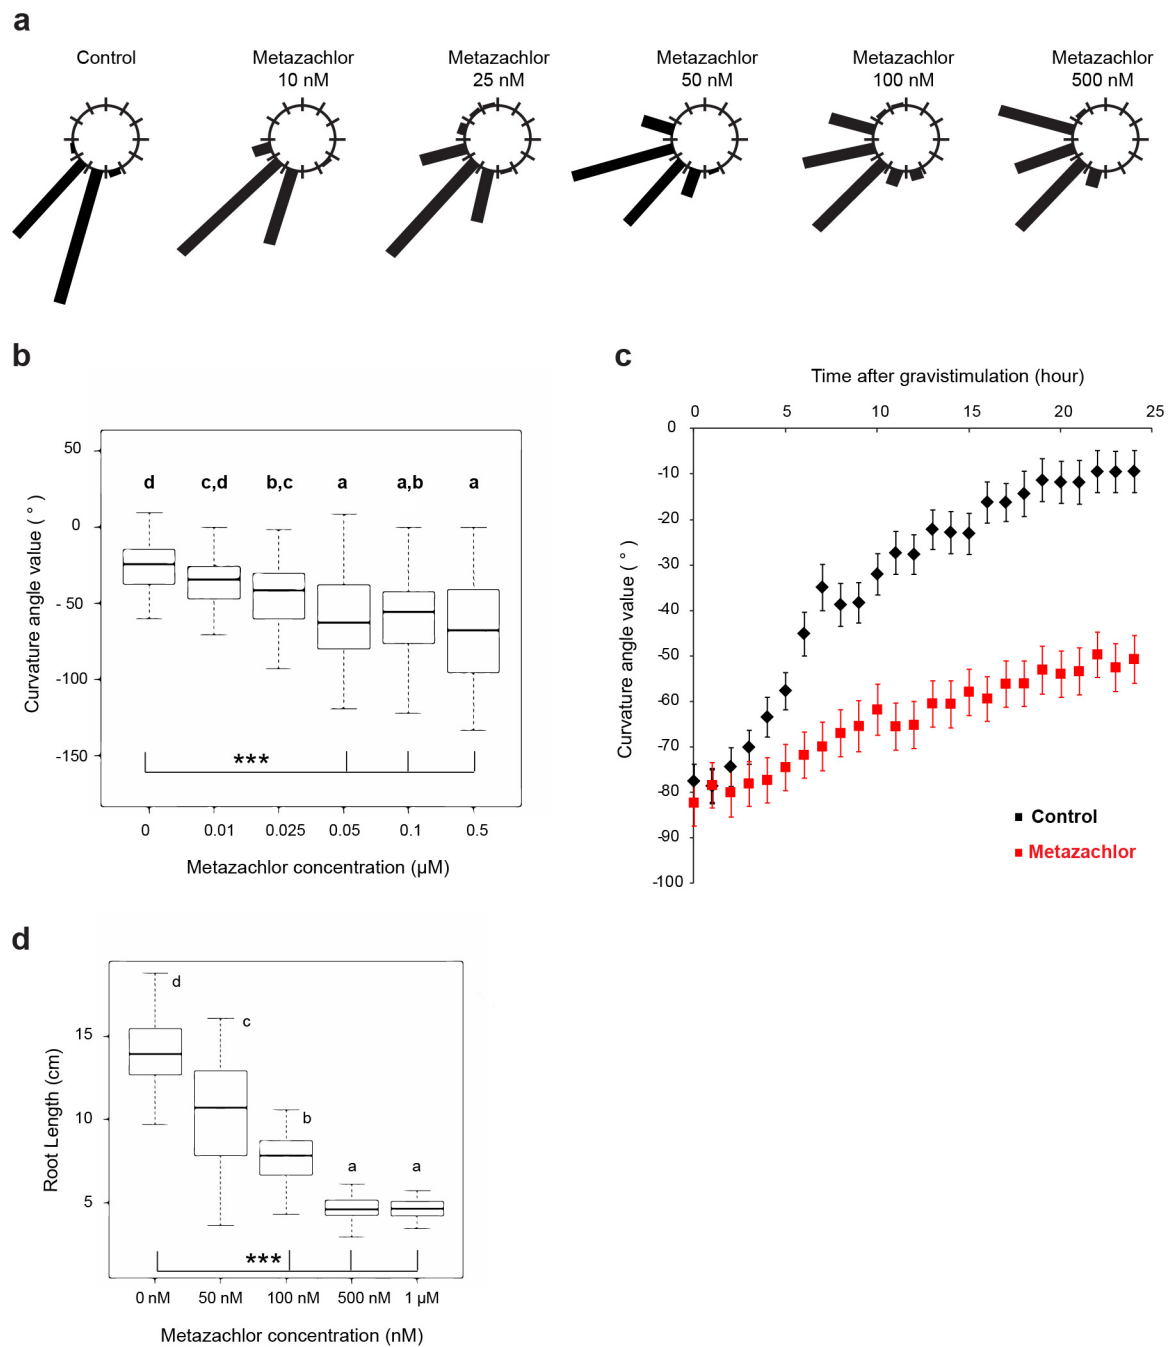

**Supplementary Fig. 3. Differential growth rather than the actual axial growth is altered by metazachlor during root gravitropism. (a)** Dose-response effect of metazachlor on the repartition of root angles bending 24h after gravistimulation. **(b)** Statistical analyses confirmed that 50 nm is the first concentration of metazachlor to produce an effect on root gravitropism (n = 72 seedlings per concentration over 3 biological replicates). **(c)** Kinematic analyses of root angles bending hour by hour following the gravistimulation (n = 24 seedlings per experiment over 2 biological replicates). Compared to untreated roots (black curve), metazachlor-treated roots (red curve) display root bending defects already from 3 hours after gravistimulation and a very slow bending towards the new gravity vector. **(d)** Statistical analyses confirmed that 50 nM metazachlor treatment results in root length close to that of untreated roots while higher concentration strongly reduce root length (n = 60 seedlings per concentration over 3 biological replicates). Statistics were done by two-sided Kruskal-Wallis rank sum test, \*\*\* p-value < 0.001.

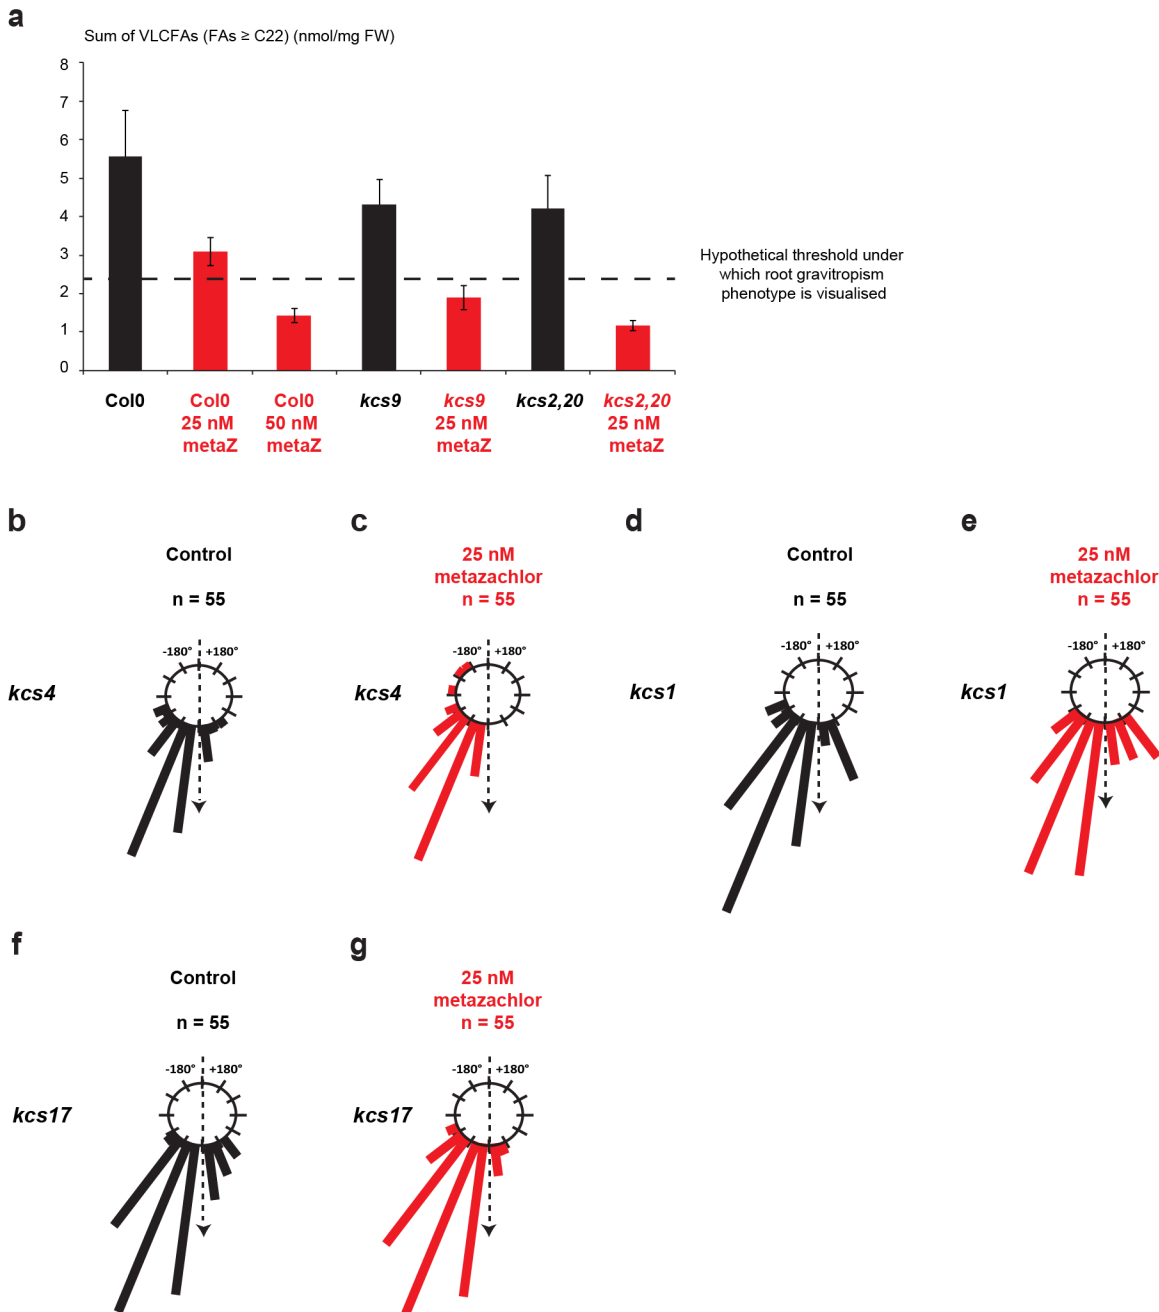

**Supplementary Fig. 4. (a) Sum of VLCFAs (nmol of VLCFAs/mg Fresh Weight, VLCFAs are FAs  $\geq$  C22) in wild-type roots (Col0) treated with 25 nM or 50 nM metazachlor and in *kcs9* and *kcs2,20* mutants roots treated with 25 nM metazachlor.** Wild-type roots (Col0) show a progressive decrease of VLCFAs upon increasing concentration (25 nM and 50 nM) of metazachlor. *kcs9* or *kcs2,20* mutants show a decrease of VLCFAs, as compared to wild-type, but not as much as 50 nM treatment with metazachlor on wild-type roots. While wild-type roots treated with 25 nM metazachlor show an intermediate decrease of VLCFAs, *kcs9* or *kcs2,20* mutants treated with 25 nM metazachlor display a strong decrease of VLCFAs, equivalent to a 50 nM metazachlor treatment on wild-type roots. n = 4 for each experiment, 4 biological replicates. Errors bars are s.d. **(b-g) Root gravitropism is not mediated by the individual action of either KCS4, KCS1 or KCS17.** Root gravitropism assays on *kcs4* mutant (**b, c**), *kcs1* mutant (**d, e**) and *kcs17* mutant (**f, g**) yield to similar results between untreated roots (**b, d, f**) and roots treated with 25 nM of metazachlor (**c, e, g**) suggesting that metazachlor effect on root gravitropism is not mediated by the individual action of KCS4, KCS1 or KCS17. Statistics were done by two-sided Kruskal-Wallis rank sum test, \*\*\* p-value < 0.001.

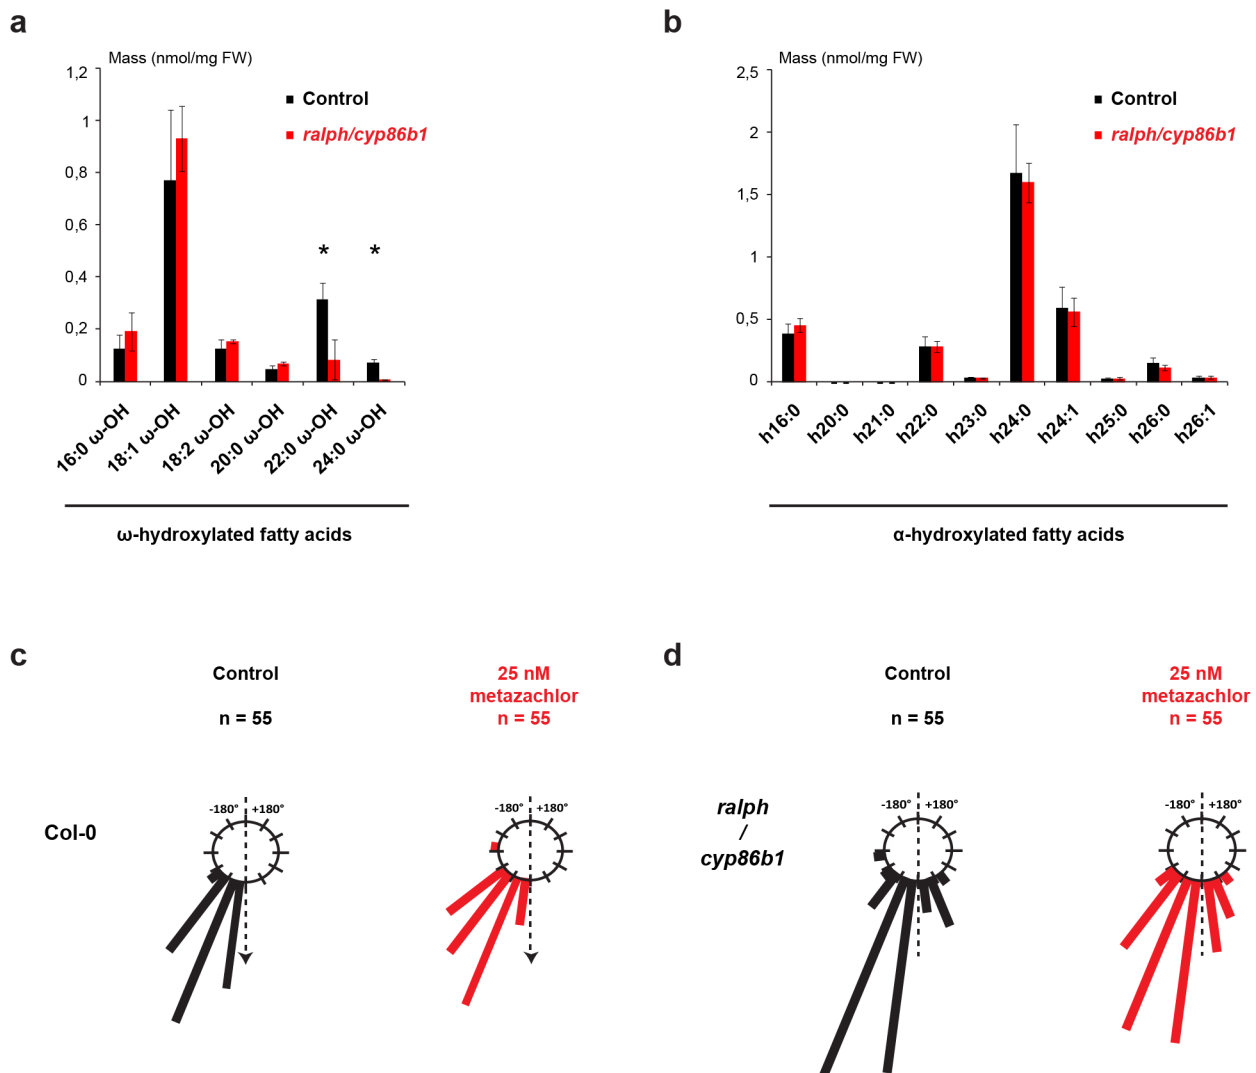

**Supplementary Fig. 5. The *ralph/cyp86b1* mutant has reduced  $\omega$ -hydroxylated VLCFAs but is not altered in  $\alpha$ -hydroxylated VLCFAs and neither display root gravitropism phenotype nor hypersensitivity to metazachlor. (a, b) Global lipid analysis of the *ralph/cyp86b1* mutant shows decrease of  $\omega$ -hydroxylated VLCFAs (a) but reveals no alteration of  $\alpha$ -hydroxylated VLCFAs (n = 4 for each genotype) (b). (c) Root gravitropism assay of untreated wild-type (Col-0) (black) and wild-type treated with 25 nM metazachlor (red). (d) Root gravitropism assay of untreated *ralph/cyp86b1* mutant (black) and *ralph/cyp86b1* mutant treated with 25 nM metazachlor (red). No significant differences could be detected between untreated Col-0 and 25 nM metazachlor-treated Col-0 and between untreated *ralph/cyp86b1* mutant and 25 nM metazachlor-treated *ralph/cyp86b1* mutant (n = 55 for each experiment). Statistics were done by two-sided Wilcoxon rank sum test, \* p-value < 0.05, n = 4 for each experiment, 4 biological replicates. Errors bars are s.d.**

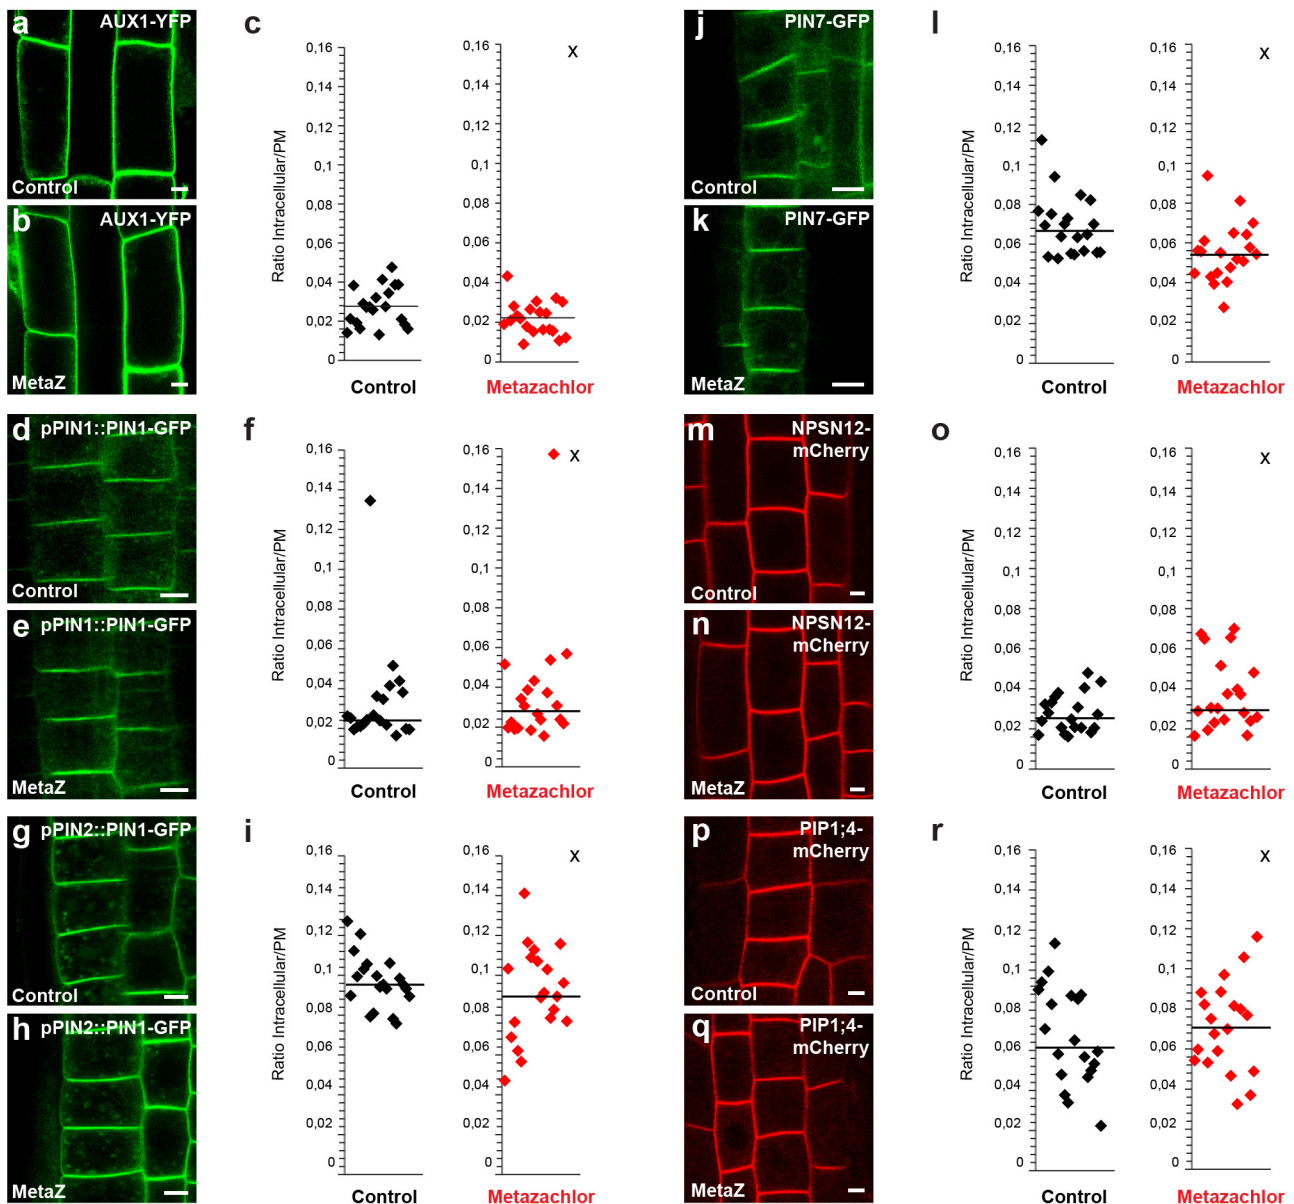

**Supplementary Fig. 6. Metazachlor neither alters localization of AUX1, PIN1 and PIN7 auxin carriers nor localization of the non-polar cargos NPSN12 and PIP1;4.** (a, b) Subcellular localization of AUX1-YFP, driven by its own promoter, in epithelial cells of untreated roots (a) and 50 nM metazachlor-treated roots (b). (d, e) Subcellular localization PIN1-GFP, driven by its own promoter, in vascular cells of untreated roots (d) and 50 nM metazachlor-treated roots (e). (g, h) Subcellular localization PIN1-GFP, driven by the PIN2 promoter, in epithelial cells of untreated roots (g) and 50 nM metazachlor-treated roots (h). (j, k) Subcellular localization PIN7-GFP, driven by its own promoter, in vascular cells of untreated roots (j) and 50 nM metazachlor-treated roots (k). (m, n) Subcellular localization NPSN12-mCherry, driven by the constitutive UBQ10 promoter, in epithelial cells of untreated roots (m) and 50 nM metazachlor-treated roots (n). (p, q) Subcellular localization of PIP1;4, driven by the constitutive UBQ10 promoter, in epithelial cells of untreated roots (p) and 50 nM metazachlor-treated roots (q). (c, f, i, l, o, r) Quantifications of fluorescence intensity ratios between the intracellular content and whole plasma membrane show no significant differences between untreated roots and 50 nM metazachlor-treated roots for all markers tested (n = 200 cells distributed over 20 roots for each experiment, 3 biological replicates). Statistics were done by two-sided Wilcoxon rank sum test, X p-value > 0.05. All scale bars are 5  $\mu$ m.

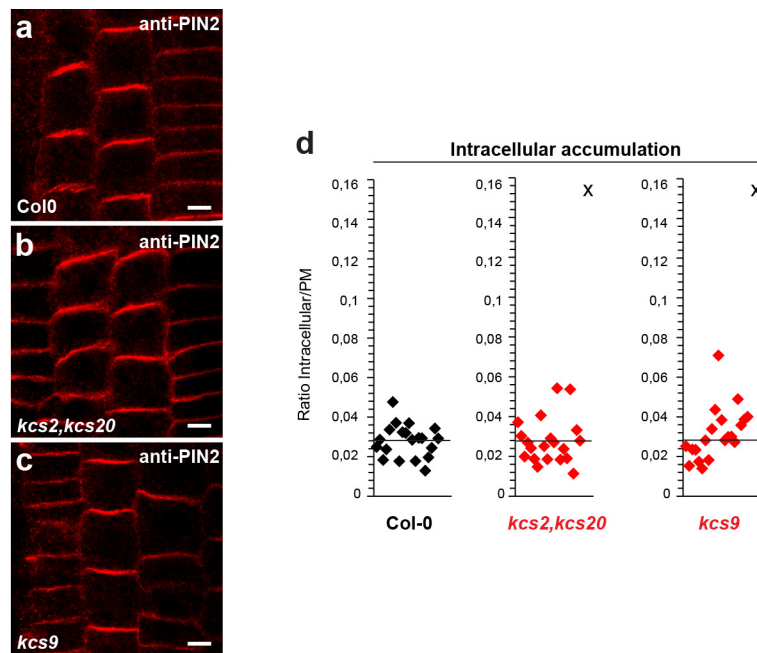

**Supplementary Fig. 7. PIN2 localization is not altered in *kcs2,20* double mutant or *kcs9* single mutant untreated with metazachlor.** (a-c) Compare to wild-type roots (a) *kcs2,20* double mutant (b) and *kcs9* single mutant (c) display similar localization of anti-PIN2 (Alexa647) in epithelial root cells. (d) Quantifications of fluorescence intensity ratios between the intracellular content and whole plasma membrane, n = 200 cells distributed over 20 roots for each experiment, 3 biological replicates). Statistics were done by two-sided Kruskal-Wallis rank sum test, X p-value > 0.05. All scale bars are 5  $\mu$ m.

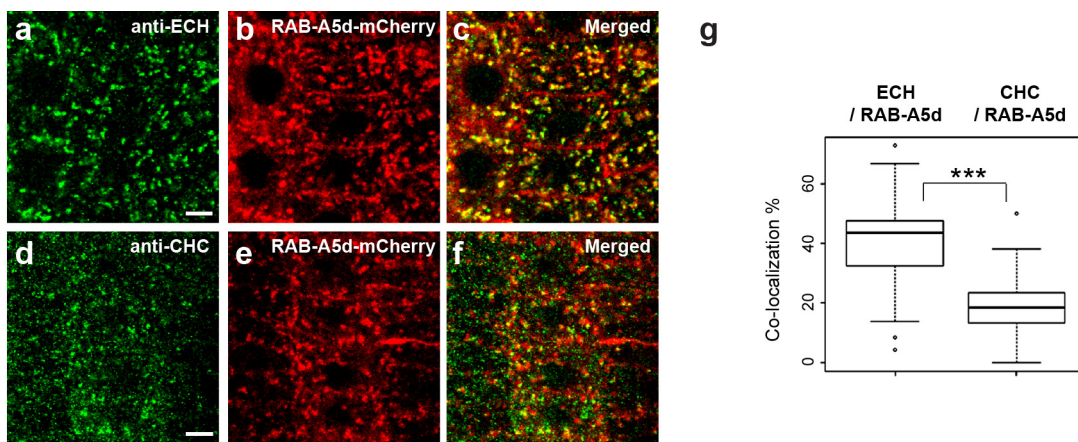

**Supplementary Fig. 8. RAB-A5d localizes at SVs sites of TGN rather than CCVs sites of TGN.**

(a-f) Co-localization of RAB-A5d-mCherry (b, e) with either the marker of SVs sites of TGN, ECH (a), or the marker of CCVs sites of TGN, CHC (d). (c, f) Merged pictures of a, b and d, e respectively. (g) Quantification of co-localisation events show a strong match of RAB-A5d with TGN-associated-SVs while weaker co-localisation is detected with TGN-associated-CCVs (n = 40 cells distributed over 10 roots for each experiment, 3 biological replicates). Statistics were done by two-sided Welch two sample T-Test, \*\*\* p-value < 0.001. All scale bars are 5  $\mu$ m.



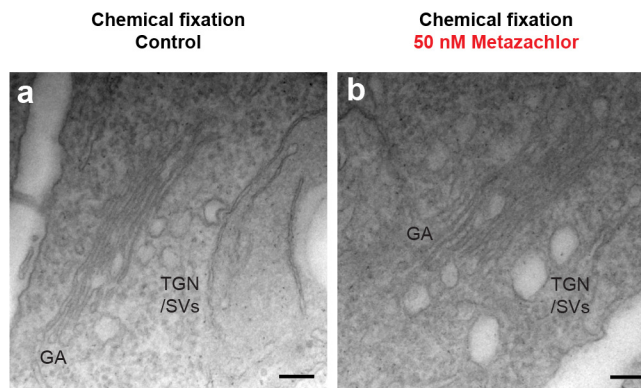

**Supplementary Fig. 9. Electron microscopy of TGN membrane structure in *Arabidopsis* roots chemically fixed. (a)** Untreated sample showing Golgi apparatus (GA) and the secretory vesicles visible as a tubulo-vesiculated membrane network (SVs/TGN) at the *trans*-side of the Golgi. **(b)** 50 nM metazachlor-treated sample showing Golgi apparatus and swollen TGN-associated secretory vesicles. Scale bars are 100 nm.
